# Supplementary material for: Inelastic Mechanical Descriptors for Osteoporotic Hip Fracture Discrimination with 3D-DXA-Based Nonlinear Finite Element Models
Source: Research Square preprint supplement (doi:10.21203/rs.3.rs-6556529/v1), 2025-05-20
Supplement: Supplementary file 1 [file 16a89cd9228fbd38daf13acc.docx]

**Appendix A**

An optimized piecewise linear method was applied to the nonlinear force-displacement data from the FE simulation to discriminate hip fracture cases from controls.

We assumed the force-displacement curve to be bilinear. The intersection point of the two linear pieces was identified through optimization with a Rosenbrock function that minimizes the difference between the FE-calculated force-displacement data points and the fitted linear segments. The Rosenbrock function is presented in Eq. (4) in which and demonstrate the FE-calculated force-displacement data points and the fitted linear segments, respectively.

|  | (4) |
| --- | --- |

The optimization was constrained by imposing: 1) the initial stiffness, according to the first converged FE solver increments; 2) the final force-displacement point calculated by the FE solver; 3) the area under the piecewise linear (i.e., mechanical energy) curve should equal the area under the nonlinear force-displacement results returned by the FE solver. Calculations were done through an in-house MATLAB code.

**Appendix B**

Fig. 5 demonstrates 3D-DXA-based finite element results for a randomly selected femur under lateral fall loading.

| 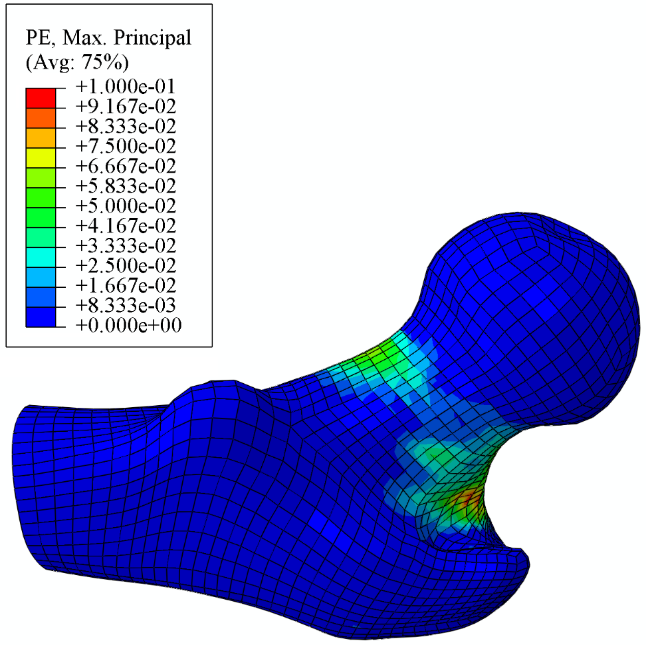 | 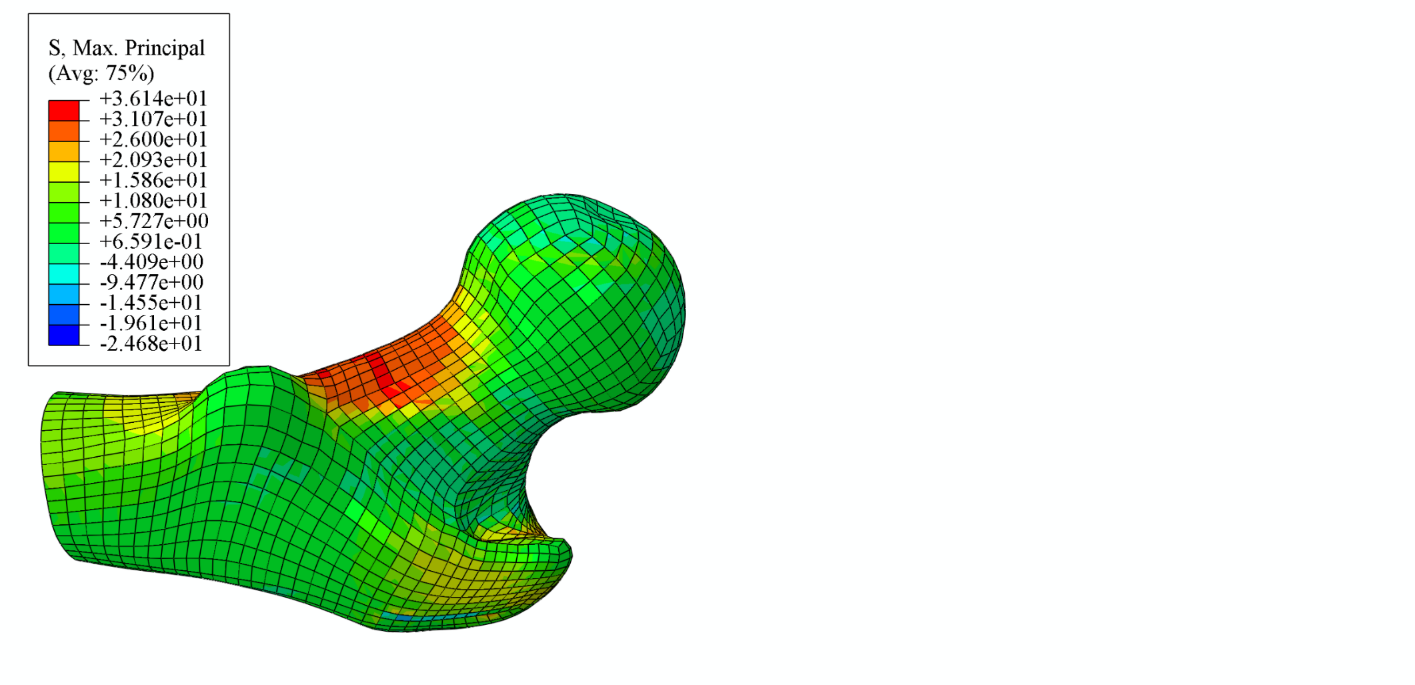 |
| --- | --- |
| (a) | (b) |

Fig. 5. 3D-DXA-based FE results for one randomly selected femur under side fall configuration at maximum reaction force: maximum principal plastic strain distribution (a) and maximum principal stress distribution (b)
